# Supplementary material for: The Incompetence Trap: The (Conditional) Irrelevance of Agency Expertise
Source: Oxford University Press journal article supplement (doi:10.1093/jopart/muw066), 2016-10-27
Supplement: muw066_suppl_Hollibaugh_Incompetence_Trap_FINAL_APPENDIX.pdf [file muw066_suppl_Hollibaugh_Incompetence_Trap_FINAL_APPENDIX.pdf]

# **The Incompetence Trap: The (Conditional) Irrelevance of Agency Expertise**

## **ONLINE APPENDIX**

Gary E. Hollibaugh, Jr.\*

October 12, 2016

---

\* Assistant Professor, Department of Political Science, University of Notre Dame, Notre Dame, IN 46556. Email: [gholliba@nd.edu](mailto:gholliba@nd.edu)

## Expected Value of $\omega$

As  $\omega \sim U[-\Omega, \Omega]$ , the marginal distribution  $f_1(\omega)$  is as follows:

$$f_1(\omega) = \begin{cases} \frac{1}{2\Omega} & \text{if } -\Omega \leq \omega \leq \Omega \\ 0 & \text{otherwise.} \end{cases}$$

Similarly, as  $\hat{\omega} \sim U[c\omega - \Omega(1 - c), c\omega + \Omega(1 - c)]$ , the conditional distribution of  $\hat{\omega}$  given  $\omega$  is as follows:

$$g_2(\hat{\omega} | \omega) = \begin{cases} \frac{1}{2\Omega - 2c\Omega} & \text{if } (1 - c)(-\Omega) + c\omega \leq \hat{\omega} \leq c\omega + (1 - c)(\Omega) \\ 0 & \text{otherwise.} \end{cases}$$

The joint distribution of the two is therefore:

$$f(\omega, \hat{\omega}) = \begin{cases} \frac{1}{4\Omega^2 - 4c\Omega^2} & \text{if } (1 - c)(-\Omega) + c\omega \leq \hat{\omega} \leq c\omega + (1 - c)(\Omega) \\ & \text{and } -\Omega \leq \omega \leq \Omega \\ 0 & \text{otherwise.} \end{cases}$$

The conditional distribution  $g_1(\omega | \hat{\omega})$  and marginal distribution  $g_2(\hat{\omega})$  will depend on the value of  $\hat{\omega}$  relative to  $c$  and  $\Omega$ .

*Case 1:* Suppose  $-\Omega < \frac{\Omega c - \Omega + \hat{\omega}}{c} \leq \omega \leq \frac{\Omega - \Omega c + \hat{\omega}}{c} < \Omega$ . Then it must hold that  $c > \max\left\{\frac{1}{2} + \frac{\hat{\omega}}{2\Omega}, \frac{1}{2} - \frac{\hat{\omega}}{2\Omega}\right\}$ . Then the marginal distribution  $g_2(\hat{\omega})$  is as follows:

$$g_2(\hat{\omega}) = \begin{cases} \frac{1}{4c\Omega - 2\Omega} & \text{if } \Omega - 2c\Omega \leq \hat{\omega} \leq 2c\Omega - \Omega \\ 0 & \text{otherwise.} \end{cases}$$

Similarly, the conditional distribution  $g_1(\omega | \hat{\omega})$  is s follows:

$$g_1(\omega | \hat{\omega}) = \begin{cases} \frac{c}{2\Omega - 2\Omega c} & \text{if } \frac{\Omega c - \Omega + \hat{\omega}}{c} \leq \omega \leq \frac{\Omega - \Omega c + \hat{\omega}}{c} \\ 0 & \text{otherwise.} \end{cases}$$

The joint distribution  $f(\omega, \hat{\omega})$  is thus:

$$\begin{aligned} f(\omega, \hat{\omega}) &= g_1(\omega | \hat{\omega})g_2(\hat{\omega}) \\ &= \begin{cases} \frac{c}{4(3c - 2c^2 - 1)\Omega^2} & \text{if } \frac{\Omega c - \Omega + \hat{\omega}}{c} \leq \omega \leq \frac{\Omega - \Omega c + \hat{\omega}}{c} \\ & \text{and } \Omega - 2c\Omega \leq \hat{\omega} \leq 2c\Omega - \Omega \\ 0 & \text{otherwise.} \end{cases} \end{aligned}$$

In this case, the conditional expectation of  $\omega$  given the observed value  $\hat{\omega}$  is as follows:

$$\begin{aligned}
E[\omega | \hat{\omega}] &= \int_{\frac{\Omega c - \Omega + \hat{\omega}}{c}}^{\frac{\Omega - \Omega c + \hat{\omega}}{c}} \frac{\omega c}{2\Omega - 2\Omega c} d\omega \\
&= \frac{\hat{\omega}}{c}.
\end{aligned}$$

*Case 2a:* Suppose  $\frac{\Omega c - \Omega + \hat{\omega}}{c} < -\Omega \leq \omega \leq \frac{\Omega - \Omega c + \hat{\omega}}{c} < \Omega$  and  $c \geq \frac{1}{2}$ . Then it must hold that  $\frac{1}{2} + \frac{\hat{\omega}}{2\Omega} < c < \frac{1}{2} - \frac{\hat{\omega}}{2\Omega}$ . From this, the marginal distribution  $g_2(\hat{\omega})$  is as follows:

$$g_2(\hat{\omega}) = \begin{cases} \frac{1}{2\Omega - 2c\Omega} & \text{if } -\Omega \leq \hat{\omega} \leq \Omega - 2c\Omega \\ 0 & \text{otherwise.} \end{cases}$$

Similarly, the conditional distribution  $g_1(\omega | \hat{\omega})$  is as follows:

$$g_1(\omega | \hat{\omega}) = \begin{cases} \frac{c}{\Omega + \hat{\omega}} & \text{if } -\Omega \leq \omega \leq \frac{\Omega - \Omega c + \hat{\omega}}{c} \\ 0 & \text{otherwise.} \end{cases}$$

The joint distribution  $f(\omega, \hat{\omega})$  is thus:

$$\begin{aligned}
f(\omega, \hat{\omega}) &= g_1(\omega | \hat{\omega})g_2(\hat{\omega}) \\
&= \begin{cases} \frac{c}{(2\Omega - 2c\Omega)(\Omega + \hat{\omega})} & \text{if } -\Omega \leq \omega \leq \frac{\Omega - \Omega c + \hat{\omega}}{c} \\ & \text{and } -\Omega \leq \hat{\omega} \leq \Omega - 2c\Omega \\ 0 & \text{otherwise.} \end{cases}
\end{aligned}$$

In this case, the conditional expectation of  $\omega$  given the observed value  $\hat{\omega}$  is as follows:

$$\begin{aligned}
E[\omega | \hat{\omega}] &= \int_{-\Omega}^{\frac{\Omega - \Omega c + \hat{\omega}}{c}} \frac{\omega c}{\Omega + \hat{\omega}} d\omega \\
&= \frac{\Omega + \hat{\omega}}{2c} - \Omega.
\end{aligned}$$

*Case 2b:* Suppose  $\frac{\Omega c - \Omega + \hat{\omega}}{c} < -\Omega \leq \omega \leq \frac{\Omega - \Omega c + \hat{\omega}}{c} < \Omega$  and  $c \leq \frac{1}{2}$ . Then it must hold that  $\frac{1}{2} + \frac{\hat{\omega}}{2\Omega} < c < \frac{1}{2} - \frac{\hat{\omega}}{2\Omega}$ . From this, the marginal distribution  $g_2(\hat{\omega})$  is as follows:

$$g_2(\hat{\omega}) = \begin{cases} \frac{1}{2c\Omega} & \text{if } -\Omega \leq \hat{\omega} \leq 2c\Omega - \Omega \\ 0 & \text{otherwise.} \end{cases}$$

Similarly, the conditional distribution  $g_1(\omega | \hat{\omega})$  is as follows:

$$g_1(\omega | \hat{\omega}) = \begin{cases} \frac{c}{\Omega + \hat{\omega}} & \text{if } -\Omega \leq \omega \leq \frac{\Omega - \Omega c + \hat{\omega}}{c} \\ 0 & \text{otherwise.} \end{cases}$$

The joint distribution  $f(\omega, \hat{\omega})$  is thus:

$$\begin{aligned} f(\omega, \hat{\omega}) &= g_1(\omega | \hat{\omega})g_2(\hat{\omega}) \\ &= \begin{cases} \frac{c}{(2c\Omega)(\Omega + \hat{\omega})} & \text{if } -\Omega \leq \omega \leq \frac{\Omega - \Omega c + \hat{\omega}}{c} \\ & \text{and } -\Omega \leq \hat{\omega} \leq 2c\Omega - \Omega \\ 0 & \text{otherwise.} \end{cases} \end{aligned}$$

In this case, the conditional expectation of  $\omega$  given the observed value  $\hat{\omega}$  is as follows:

$$\begin{aligned} E[\omega | \hat{\omega}] &= \int_{-\Omega}^{\frac{\Omega - \Omega c + \hat{\omega}}{c}} \frac{\omega c}{\Omega + \hat{\omega}} d\omega \\ &= \frac{\Omega + \hat{\omega}}{2c} - \Omega. \end{aligned}$$

*Case 3a:* Suppose  $-\Omega < \frac{\Omega c - \Omega + \hat{\omega}}{c} \leq \omega \leq \Omega < \frac{\Omega - \Omega c + \hat{\omega}}{c}$  and  $c \geq \frac{1}{2}$ . Then it must hold that  $\frac{1}{2} - \frac{\hat{\omega}}{2\Omega} < c < \frac{1}{2} + \frac{\hat{\omega}}{2\Omega}$ . From this, the marginal distribution  $g_2(\hat{\omega})$  is as follows:

$$g_2(\hat{\omega}) = \begin{cases} \frac{1}{2\Omega - 2c\Omega} & \text{if } 2c\Omega - \Omega \leq \hat{\omega} \leq \Omega \\ 0 & \text{otherwise.} \end{cases}$$

Similarly, the conditional distribution is

$$g_1(\omega | \hat{\omega}) = \begin{cases} \frac{c}{\Omega - \hat{\omega}} & \text{if } \frac{\Omega c - \Omega + \hat{\omega}}{c} \leq \omega \leq \Omega \\ 0 & \text{otherwise.} \end{cases}$$

The joint distribution  $f(\omega, \hat{\omega})$  is thus:

$$\begin{aligned} f(\omega, \hat{\omega}) &= g_1(\omega | \hat{\omega})g_2(\hat{\omega}) \\ &= \begin{cases} \frac{c}{(2\Omega - 2c\Omega)(\Omega - \hat{\omega})} & \text{if } \frac{\Omega c - \Omega + \hat{\omega}}{c} \leq \omega \leq \Omega \\ & \text{and } 2c\Omega - \Omega \leq \hat{\omega} \leq \Omega \\ 0 & \text{otherwise.} \end{cases} \end{aligned}$$

In this case, the conditional expectation of  $\omega$  given the observed value  $\hat{\omega}$  is as follows:



$$\begin{aligned}
E[\omega | \hat{\omega}] &= \int_{\frac{\Omega c - \Omega + \hat{\omega}}{c}}^{\Omega} \frac{\omega c}{\Omega - \hat{\omega}} d\omega \\
&= \Omega + \frac{\hat{\omega} - \Omega}{2c}.
\end{aligned}$$

*Case 3b:* Suppose  $-\Omega < \frac{\Omega c - \Omega + \hat{\omega}}{c} \leq \omega \leq \Omega < \frac{\Omega - \Omega c + \hat{\omega}}{c}$  and  $c \leq \frac{1}{2}$ . Then it must hold that  $\frac{1}{2} - \frac{\hat{\omega}}{2\Omega} < c < \frac{1}{2} + \frac{\hat{\omega}}{2\Omega}$ . From this, the marginal distribution  $g_2(\hat{\omega})$  is as follows:

$$g_2(\hat{\omega}) = \begin{cases} \frac{1}{2c\Omega} & \text{if } \Omega - 2c\Omega \leq \hat{\omega} \leq \Omega \\ 0 & \text{otherwise.} \end{cases}$$

Similarly, the conditional distribution is

$$g_1(\omega | \hat{\omega}) = \begin{cases} \frac{c}{\Omega - \hat{\omega}} & \text{if } \frac{\Omega c - \Omega + \hat{\omega}}{c} \leq \omega \leq \Omega \\ 0 & \text{otherwise.} \end{cases}$$

The joint distribution  $f(\omega, \hat{\omega})$  is thus:

$$\begin{aligned}
f(\omega, \hat{\omega}) &= g_1(\omega | \hat{\omega})g_2(\hat{\omega}) \\
&= \begin{cases} \frac{c}{(2c\Omega)(\Omega - \hat{\omega})} & \text{if } \frac{\Omega c - \Omega + \hat{\omega}}{c} \leq \omega \leq \Omega \\ & \text{and } \Omega - 2c\Omega \leq \hat{\omega} \leq \Omega \\ 0 & \text{otherwise.} \end{cases}
\end{aligned}$$

In this case, the conditional expectation of  $\omega$  given the observed value  $\hat{\omega}$  is as follows:

$$\begin{aligned}
E[\omega | \hat{\omega}] &= \int_{\frac{\Omega c - \Omega + \hat{\omega}}{c}}^{\Omega} \frac{\omega c}{\Omega - \hat{\omega}} d\omega \\
&= \Omega + \frac{\hat{\omega} - \Omega}{2c}.
\end{aligned}$$

*Case 4:* Suppose  $\frac{\Omega c - \Omega + \hat{\omega}}{c} < -\Omega \leq \omega \leq \Omega < \frac{\Omega - \Omega c + \hat{\omega}}{c}$ . Then it must hold that  $c < \min\left\{\frac{1}{2} + \frac{\hat{\omega}}{2\Omega}, \frac{1}{2} - \frac{\hat{\omega}}{2\Omega}\right\}$ . From this, the marginal distribution  $g_2(\hat{\omega})$  is as follows:

$$g_2(\hat{\omega}) = \begin{cases} \frac{1}{2\Omega - 4c\Omega} & \text{if } 2c\Omega - \Omega \leq \hat{\omega} \leq \Omega - 2c\Omega \\ 0 & \text{otherwise.} \end{cases}$$

Similarly, the conditional distribution is

$$g_1(\omega | \hat{\omega}) = \begin{cases} \frac{1}{2\Omega} & \text{if } -\Omega \leq \omega \leq \Omega \\ 0 & \text{otherwise.} \end{cases}$$

The joint distribution  $f(\omega, \hat{\omega})$  is thus:

$$\begin{aligned} f(\omega, \hat{\omega}) &= g_1(\omega | \hat{\omega})g_2(\hat{\omega}) \\ &= \begin{cases} \frac{1}{4\Omega^2 - 8c\Omega^2} & \text{if } -\Omega \leq \omega \leq \Omega \\ & \text{and } 2c\Omega - \Omega \leq \hat{\omega} \leq \Omega - 2c\Omega \\ 0 & \text{otherwise.} \end{cases} \end{aligned}$$

In this case, the conditional expectation of  $\omega$  given the observed value  $\hat{\omega}$  is as follows:

$$\begin{aligned} E[\omega | \hat{\omega}] &= \int_{-\Omega}^{\Omega} \frac{\omega}{2\Omega} d\omega \\ &= 0. \end{aligned}$$

Putting it all together, conditional on the observed value  $\hat{\omega}$ , the expected value of  $\omega$  is given by

$$E[\omega | \hat{\omega}] = \begin{cases} \frac{\hat{\omega}}{c} & \text{if } c \geq \max\left\{\frac{1}{2} + \frac{\hat{\omega}}{2\Omega}, \frac{1}{2} - \frac{\hat{\omega}}{2\Omega}\right\} \\ \frac{\Omega + \hat{\omega}}{2c} - \Omega & \text{if } \frac{1}{2} + \frac{\hat{\omega}}{2\Omega} \leq c \leq \frac{1}{2} - \frac{\hat{\omega}}{2\Omega} \\ \Omega + \frac{\hat{\omega} - \Omega}{2c} & \text{if } \frac{1}{2} - \frac{\hat{\omega}}{2\Omega} \leq c \leq \frac{1}{2} + \frac{\hat{\omega}}{2\Omega} \\ 0 & \text{if } c \leq \min\left\{\frac{1}{2} + \frac{\hat{\omega}}{2\Omega}, \frac{1}{2} - \frac{\hat{\omega}}{2\Omega}\right\}. \end{cases}$$

## Expected Utilities Given $E[\omega | \hat{\omega}]$

After observing  $\hat{\omega}$ , the agency sets a policy  $p \in \mathbb{R}$ , which it chooses in order to maximize  $Eu_A(p | \hat{\omega}) = -(p + E[\omega | \hat{\omega}] - x_A)^2$ . Clearly, the agency will set  $p^*(\hat{\omega}) = x_A - E[\omega | \hat{\omega}]$ . Given this strategy, the expected utility of player  $i$  takes the following general form:

$$Eu_i(x_A, c) = \int \int -g_1(\omega | \hat{\omega})g_2(\hat{\omega})(x_A - E[\omega | \hat{\omega}] + \omega - x_i)^2 d\omega d\hat{\omega}.$$

When  $c \in \left[\frac{1}{2}, 1\right]$ , the expected value is

$$\begin{aligned}
Eu_i(x_A, c) &= \left[ \int_{-\Omega}^{\Omega-2c\Omega} \int_{-\Omega}^{\frac{\Omega-\Omega c+\hat{\omega}}{c}} - \frac{c \left( x_A + \Omega - \frac{\Omega + \hat{\omega}}{2c} + \omega - x_i \right)^2}{(2\Omega - 2c\Omega)(\Omega + \hat{\omega})} d\omega d\hat{\omega} \right. \\
&\quad + \int_{\Omega-2c\Omega}^{2c\Omega-\Omega} \int_{\frac{\Omega c-\Omega+\hat{\omega}}{c}}^{\frac{\Omega-\Omega c+\hat{\omega}}{c}} - \frac{c \left( x_A - \frac{\hat{\omega}}{c} + \omega - x_i \right)^2}{4(3c - 2c^2 - 1)\Omega^2} d\omega d\hat{\omega} \\
&\quad \left. + \int_{2c\Omega-\Omega}^{\Omega} \int_{\frac{\Omega c-\Omega+\hat{\omega}}{c}}^{\Omega} - \frac{c \left( x_A - \Omega + \frac{\Omega - \hat{\omega}}{2c} + \omega - x_i \right)^2}{(2\Omega - 2c\Omega)(\Omega - \hat{\omega})} d\omega d\hat{\omega} \right] \\
&= -3(x_A - x_i)^2 - \frac{15(1-c)^2\Omega^2}{27c^2}.
\end{aligned}$$

When  $c \in \left(0, \frac{1}{2}\right]$ , the expected value is

$$\begin{aligned}
Eu_i(x_A, c) &= \left[ \int_{-\Omega}^{2c\Omega-\Omega} \int_{-\Omega}^{\frac{\Omega-\Omega c+\hat{\omega}}{c}} - \frac{c \left( x_A + \Omega - \frac{\Omega + \hat{\omega}}{2c} + \omega - x_i \right)^2}{(2c\Omega)(\Omega + \hat{\omega})} d\omega d\hat{\omega} \right. \\
&\quad + \int_{2c\Omega-\Omega}^{\Omega-2c\Omega} \int_{-\Omega}^{\Omega} - \frac{(x_A + \omega - x_i)^2}{4\Omega^2 - 8c\Omega^2} d\omega d\hat{\omega} \\
&\quad \left. + \int_{\Omega-2c\Omega}^{\Omega} \int_{\frac{\Omega c-\Omega+\hat{\omega}}{c}}^{\Omega} - \frac{c \left( x_A - \Omega + \frac{\Omega - \hat{\omega}}{2c} + \omega - x_i \right)^2}{(2c\Omega)(\Omega - \hat{\omega})} d\omega d\hat{\omega} \right] \\
&= -3(x_A - x_i)^2 - \frac{15\Omega^2}{27}.
\end{aligned}$$

Therefore, after normalizing by dividing by three:

$$Eu_i(x_A, c) = \begin{cases} -(x_A - x_i)^2 - \frac{5(1-c)^2\Omega^2}{27c^2} & \text{if } c \in \left[\frac{1}{2}, 1\right] \\ -(x_A - x_i)^2 - \frac{5\Omega^2}{27} & \text{if } c \in \left(0, \frac{1}{2}\right] \end{cases}$$
